# Supplementary material for: Plasmodium falciparum infection dysregulates placental autophagy
Source: PLOS journal article supplement (doi:10.1371/journal.pone.0226117), 2019-12-05

# ***Plasmodium falciparum* infection dysregulates placental autophagy**

Flávia A. Lima<sup>1,¶</sup>, André Barateiro<sup>1,¶</sup>, Jamille G. Dombrowski<sup>1</sup>, Rodrigo M. de Souza<sup>2</sup>, Douglas S. Costa<sup>1</sup>, Oscar Murillo<sup>1</sup>, Sabrina Epiphany<sup>3</sup>, Lígia A. Gonçalves<sup>1,&,\*</sup>, Claudio R. F. Marinho<sup>1,&,\*</sup>

<sup>1</sup>Department of Parasitology, Institute of Biomedical Sciences, University of São Paulo, São Paulo, Brazil

<sup>2</sup>Multidisciplinary Centre, Federal University of Acre, Acre, Brazil

<sup>3</sup>Department of Clinical and Toxicological Analysis, School of Pharmaceutical Sciences, University of São Paulo, São Paulo, Brazil

\*Corresponding authors:

E-mail: marinho@usp.br (CRFM) and lig.antunes.goncalves@gmail.com

¶These authors contributed equally to this work

&These authors also contributed equally to this work

**Short title:** *P. falciparum* affects placental autophagy.

**S1 Raw Images.** Full-length and untreated images of western blots are shown for ULK1 (120 kDa), BECLIN1 (52 kDa), LC3I, and LC3II (16 and 14 kDa, respectively) and a representative blotting for  $\beta$ -ACTIN (42 kDa) is depicted knowing that this endogenous control was performed in the same membrane as the corresponding protein of interest. Placental protein samples from non-infected (14) and *P. falciparum*-infected (14) women were randomly selected and separated in two different western blots gel/membrane and electrophoresis, blotting, and acquisition were performed simultaneously. Herein, we show the samples/lanes identified with a number from 1 to 28, and a “X” identifying the lanes that were not used in the Fig 2A of the manuscript. Acquisition was performed for both gels of the same marker at the same time using the ChemiDoc XRS+ at an exposure of 120.0 (ULK1), 30.0 (BECLIN1), 50.0 (LC3) and 20.0 ( $\beta$ -ACTIN) seconds. Molecular mass ladder is depicted for each gel (Precision Plus Protein™ Standards, BIO-RAD).

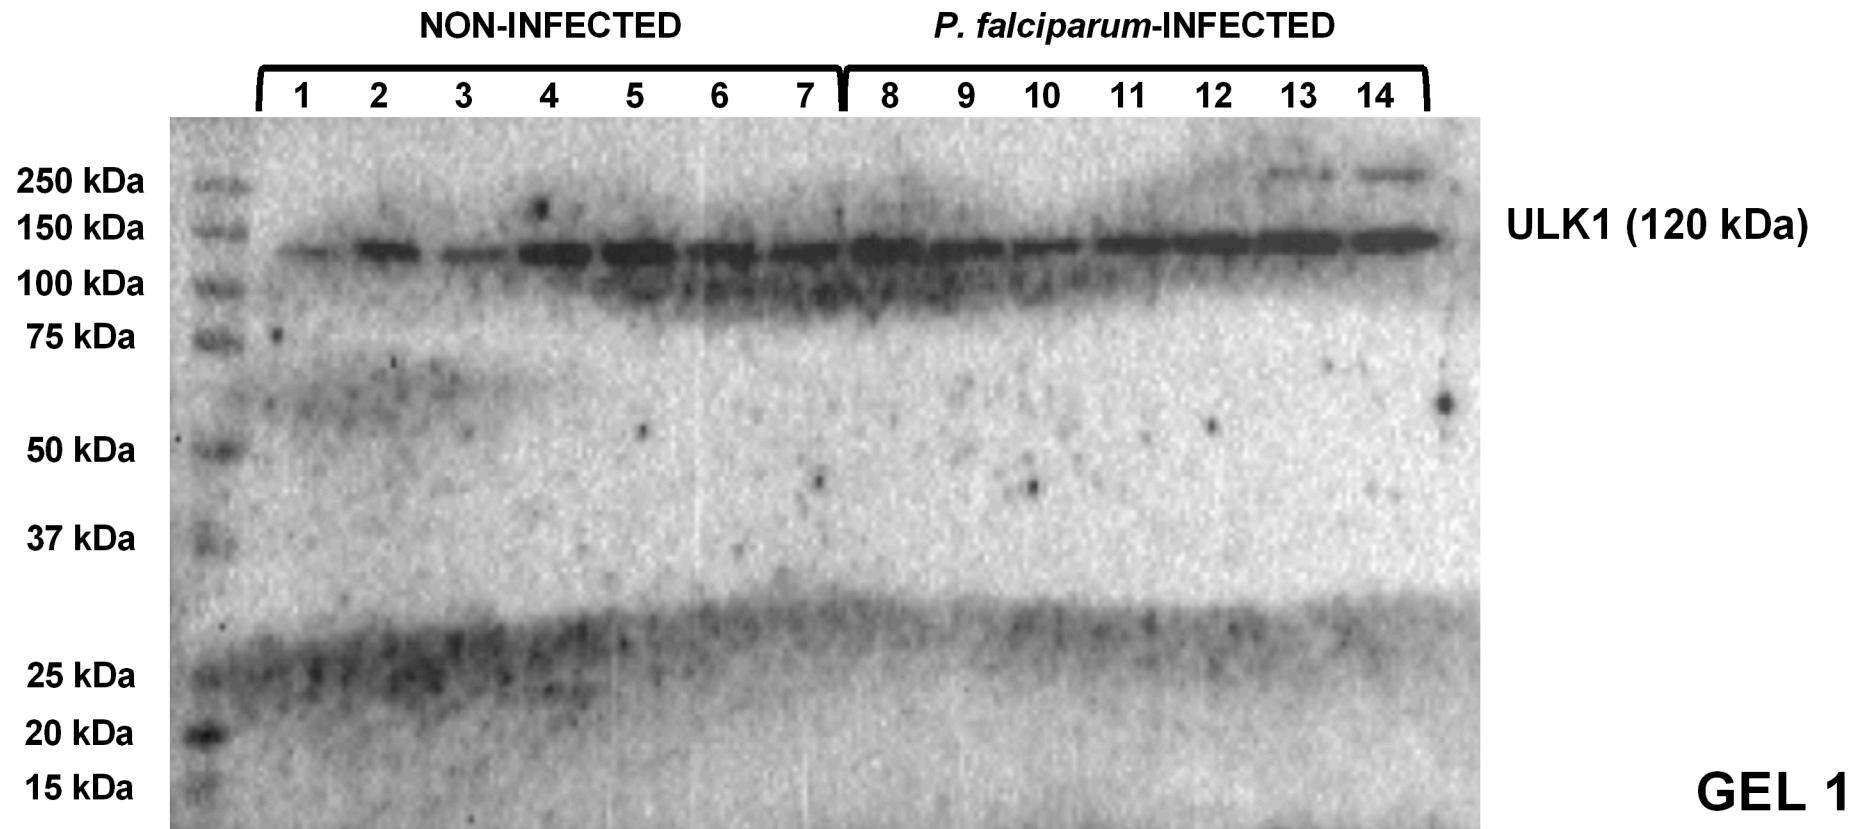

NON-INFECTED

*P. falciparum*-INFECTED

X

15 16 17 18 19 20 21 22 23 24 25 26 27 28

250 kDa

150 kDa

100 kDa

75 kDa

50 kDa

37 kDa

25 kDa

20 kDa

15 kDa

ULK1 (120 kDa)

GEL 2

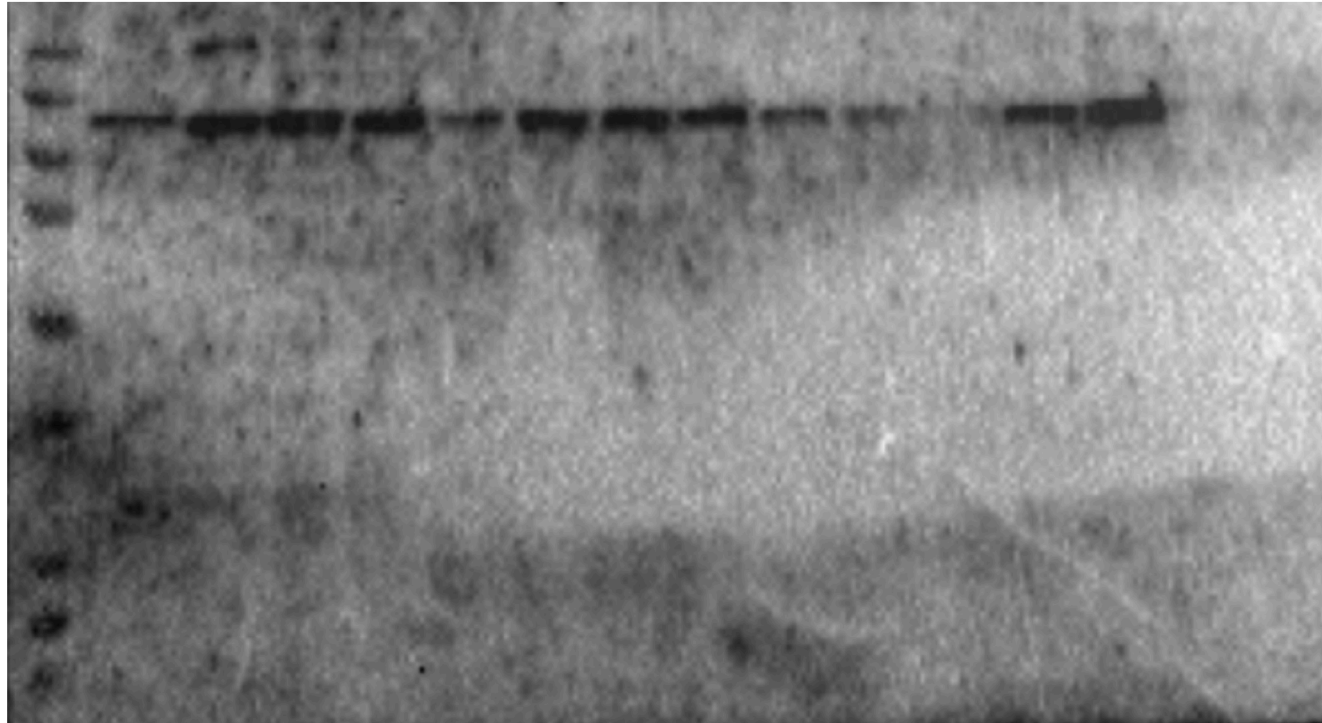



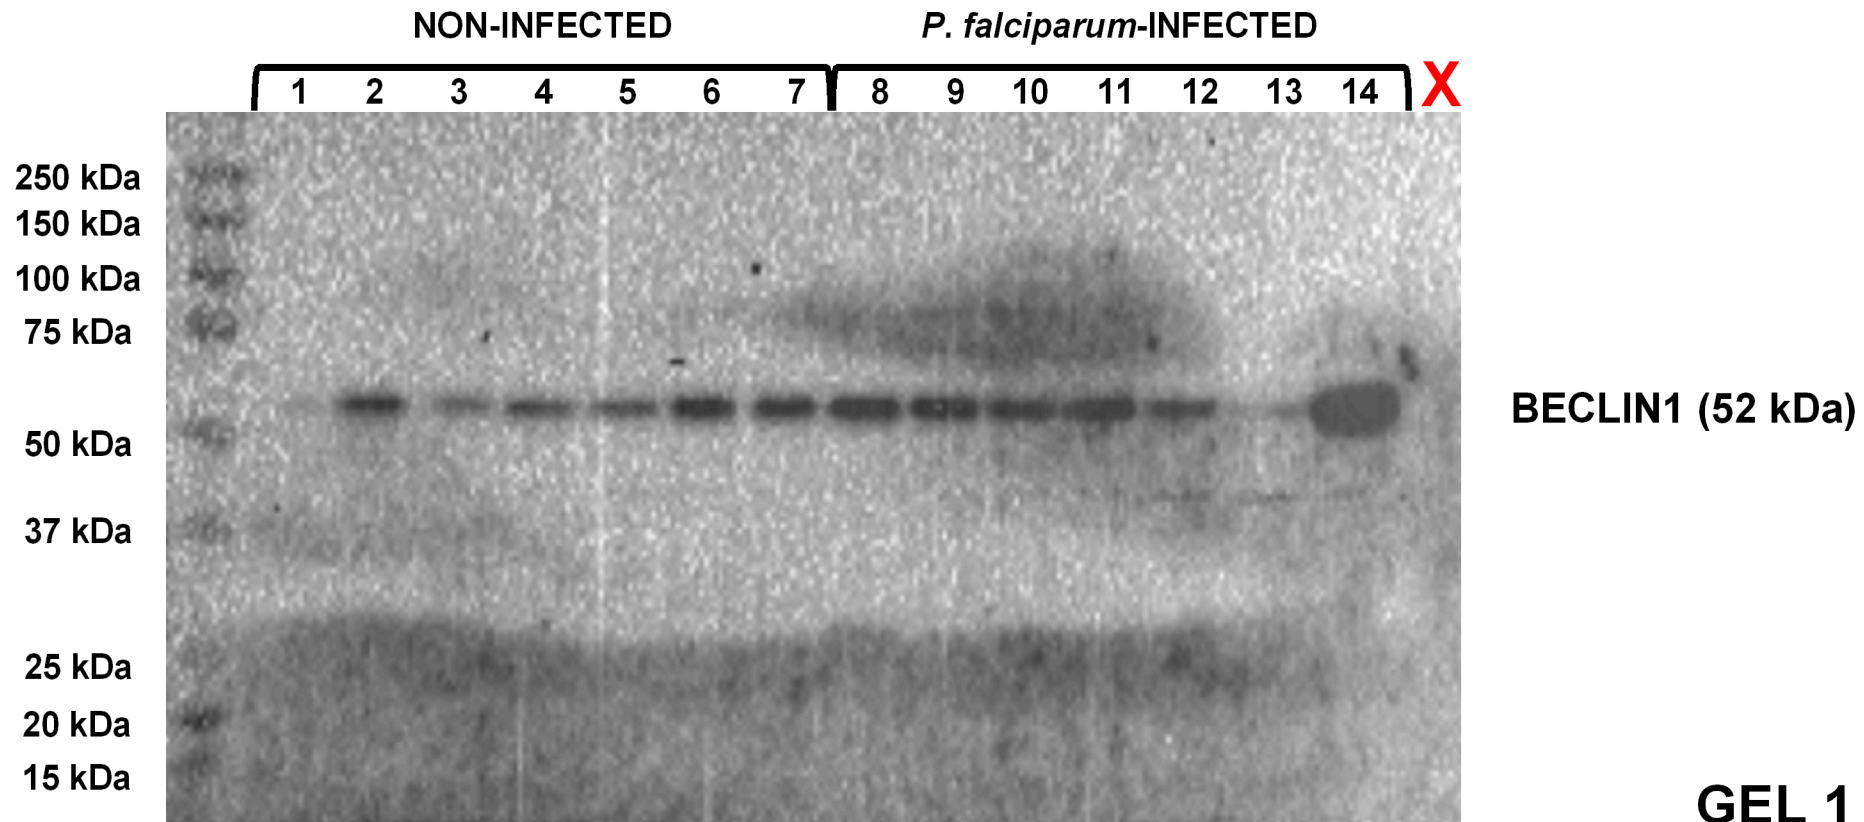

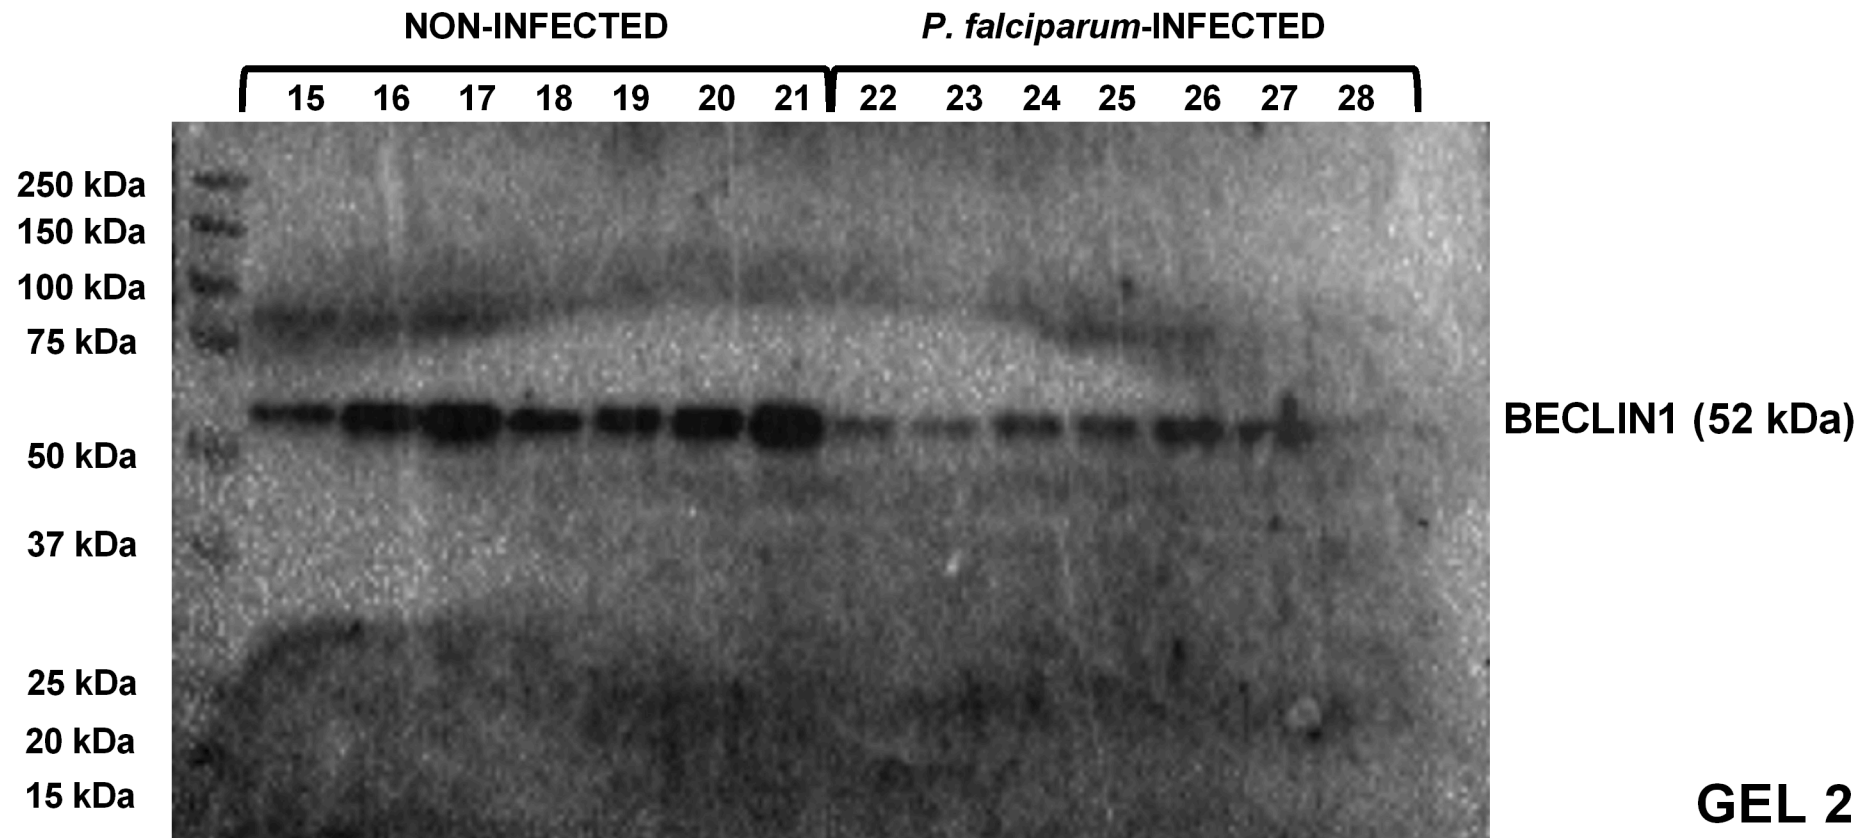

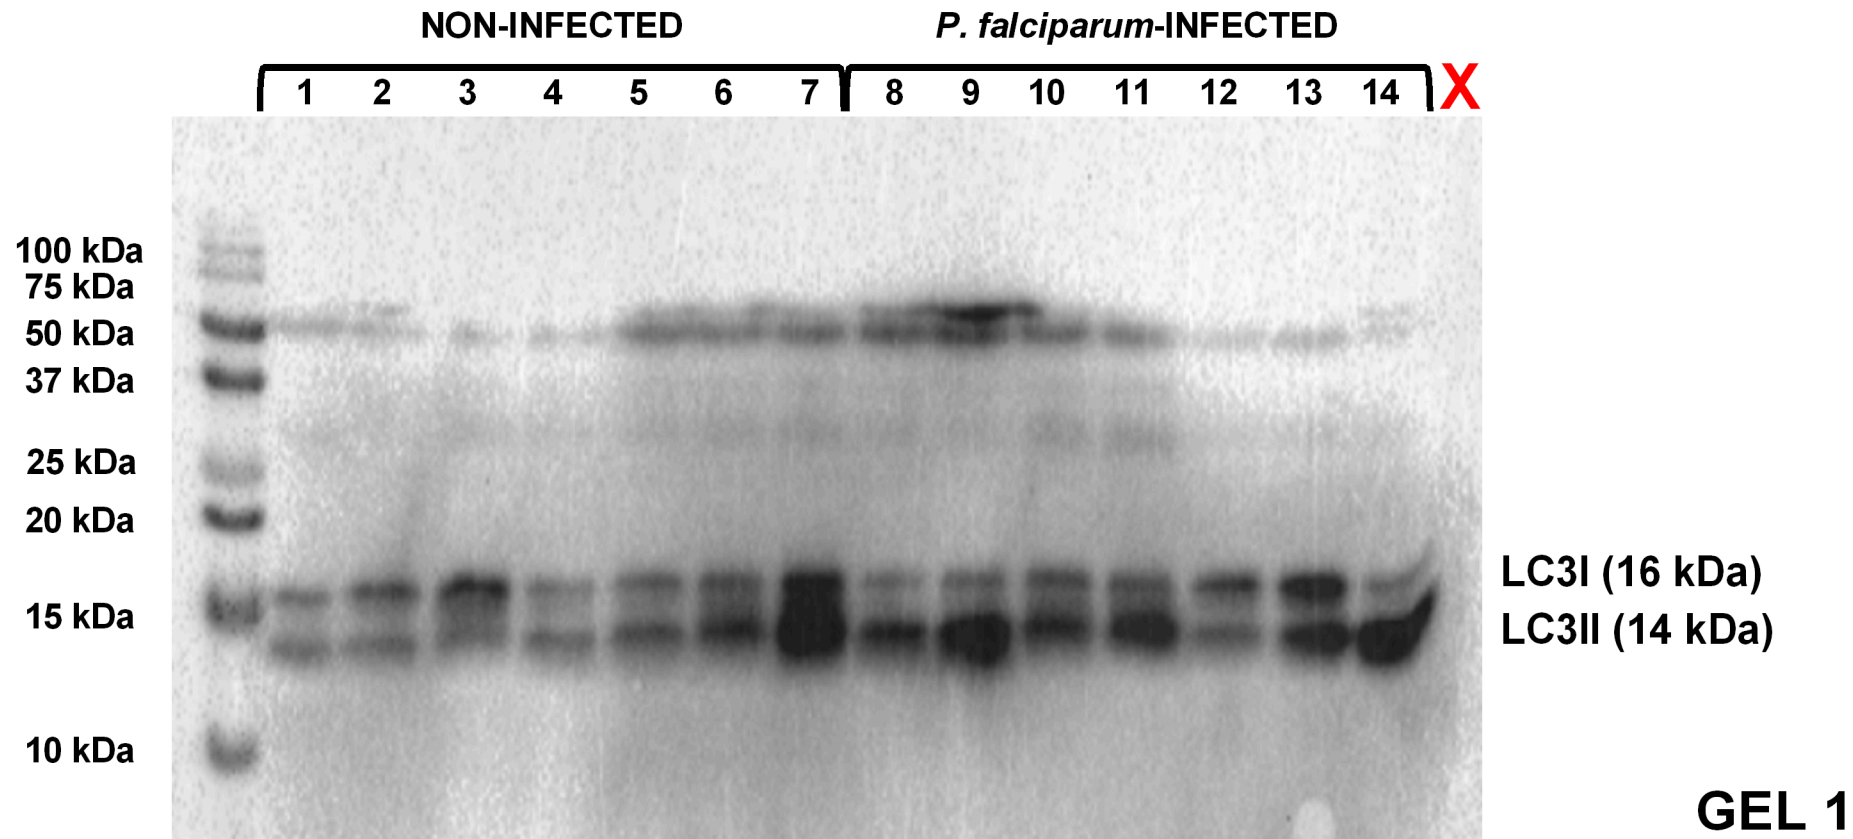

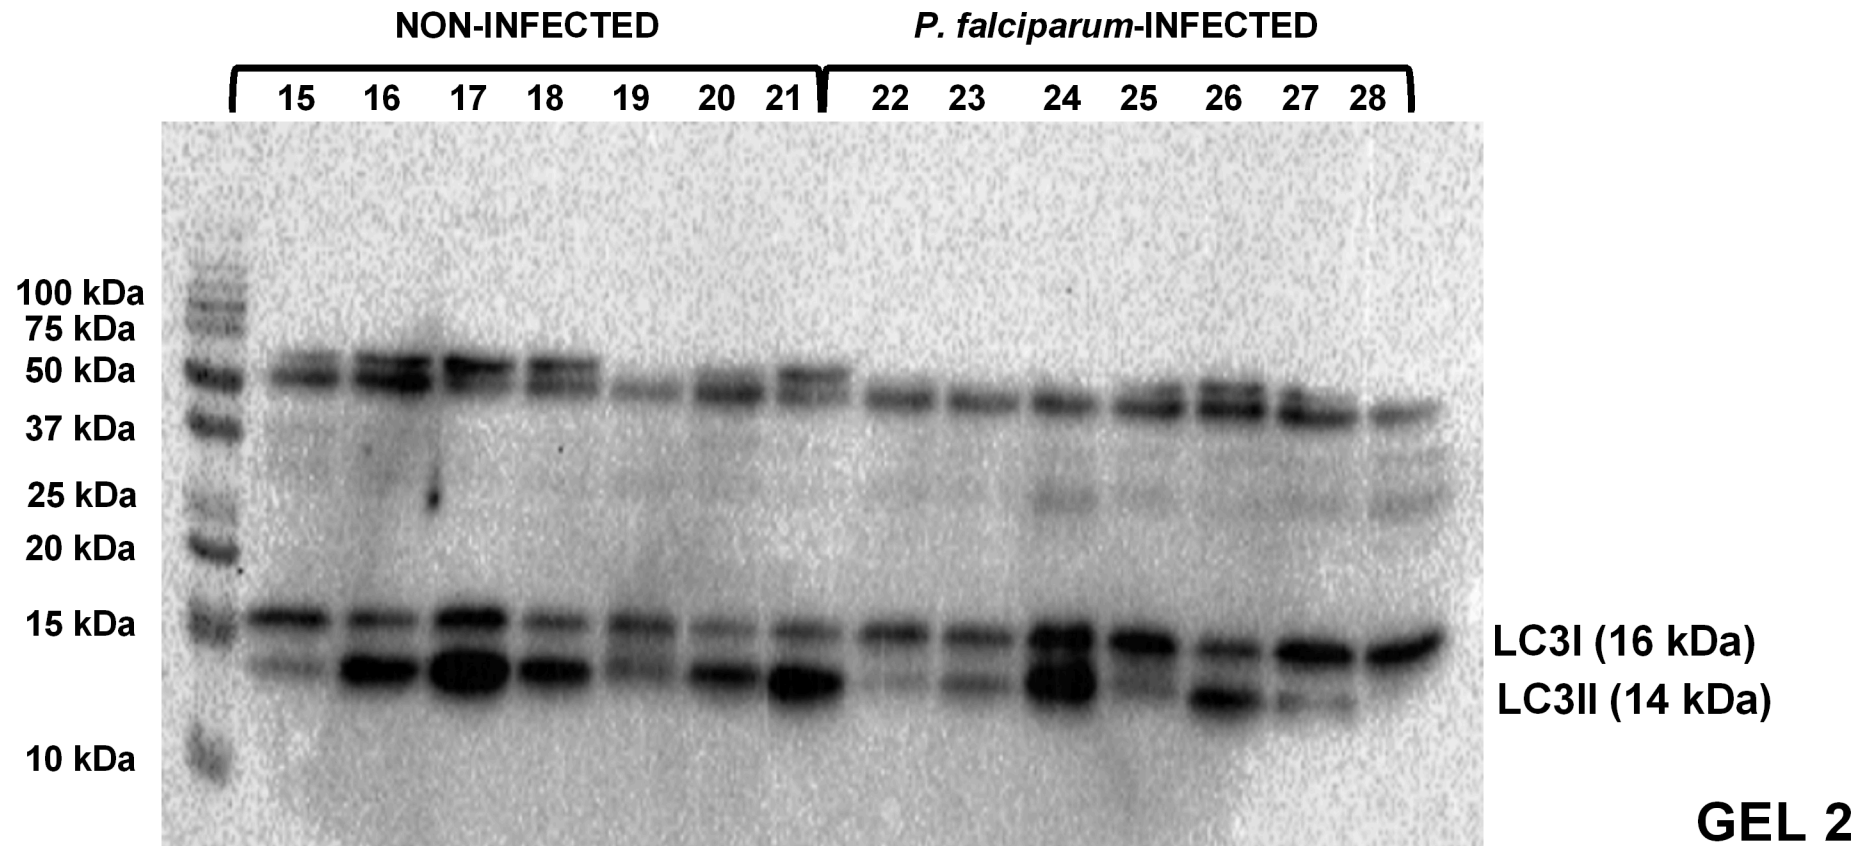

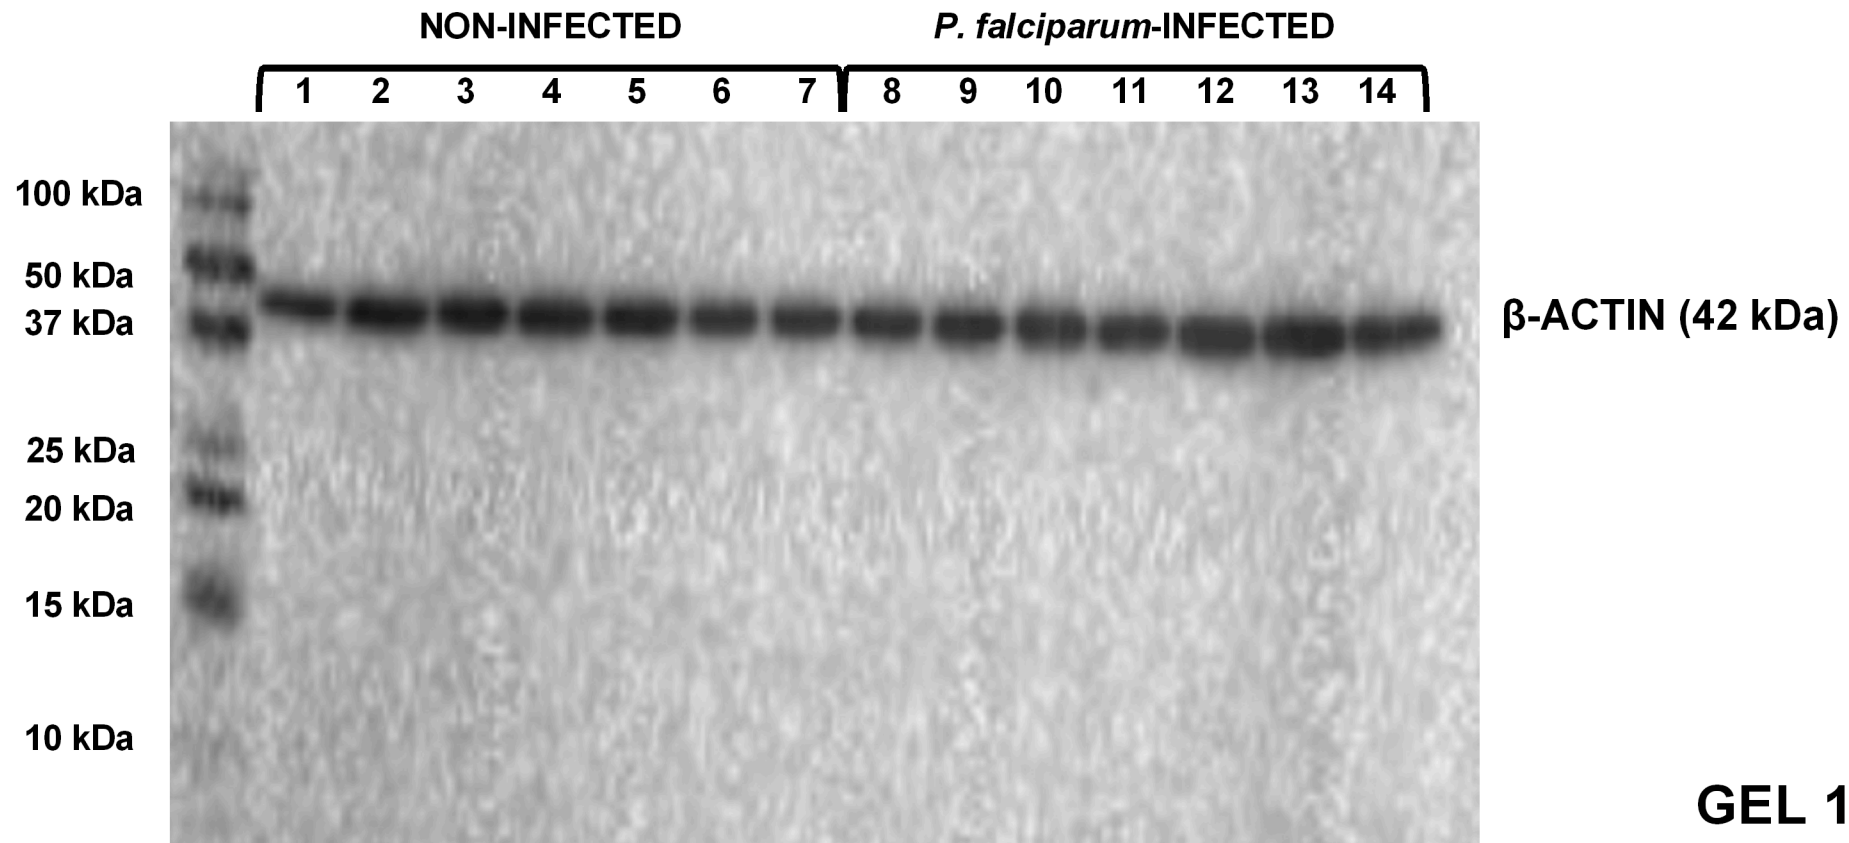

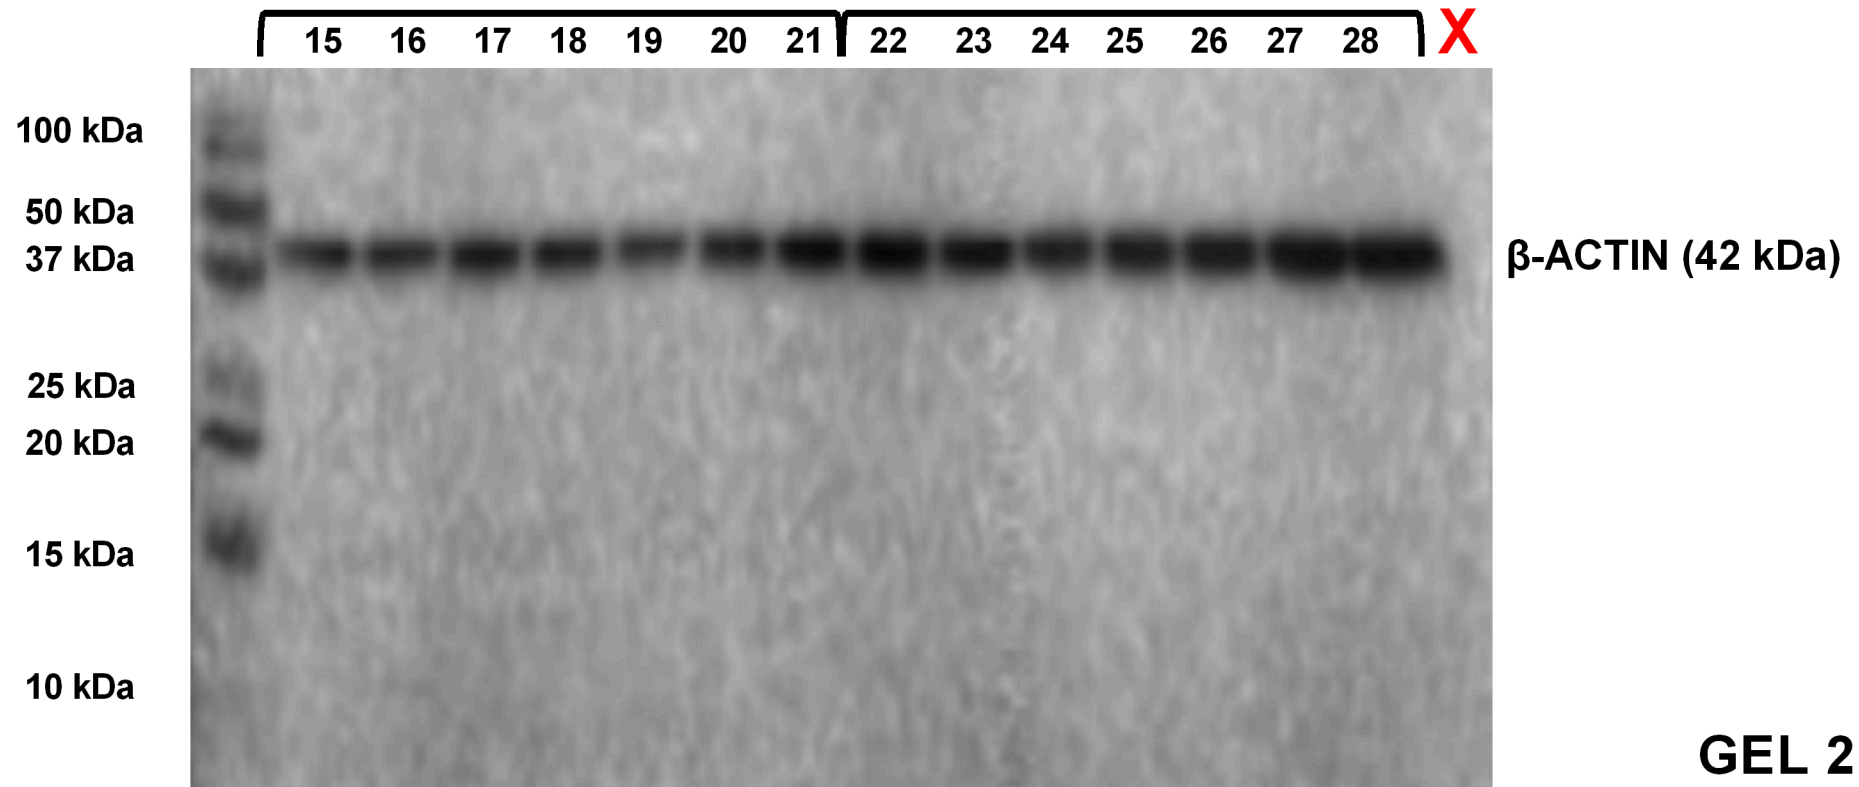

Supplement: S5 (10.1371/journal.pone.0226117.s005) [file journal.pone.0226117.s005]
