# Supplementary material for: Plasmodium falciparum infection dysregulates placental autophagy
Source: PLoS One. 2019 Dec 5;14(12):e0226117. doi: 10.1371/journal.pone.0226117 (PMC6894763; doi:10.1371/journal.pone.0226117)
Supplement: S1 Dataset — Please see excel file for documentation. (XLSX) [file pone.0226117.s004.xlsx]

## Sheet: GENERAL DATA
ID	PM	AGE	PARITY	BIRTH WEIGHT (g)	PLACENTAL WEIGHT (g)	FETALWEIGHT/PLACENTALWEIGHT	GESTATIONAL AGE	MATERNAL WEIGHT (kg)	PARASITEMIA 1º INFECTION	PARASITEMIA DELIVERY	PLACENTAL PARASITEMIA	HEIGHT (m)	HEIGHT x2	BMI	HEMOZOIN	SYNCYTIAL NUCLEAR AGGREGATES	FIBRIN	NECROSIS	VASCULARITY	LEUKOCYTES	MONONUCLEAR	IL12	IL8	TNF	IL10	IL6	IL1b	ULK1 mRNA	BECN1 mRNA	MAP1LC3 mRNA	ULK1 DENSITOMETRY WB	BECLIN1 DENSITOMETRY WB	LC3II DENSITOMETRY WB	BETA-ACTIN DENSITOMETRY WB (ULK1 GEL)	BETA-ACTIN DENSITOMETRY WB (BECLIN1 GEL)	BETA-ACTIN DENSITOMETRY WB (LC3II GEL)	ULK1/BETA-ACTIN WB	BECLIN1/BETA-ACTIN WB	LC3II/BETA-ACTIN WB
3	0	20	2	2590	461.2	5.61578	37	65	23759.2	.	.	1.55	3.1	20.9677	0	23	1.67	7.96	5.4	39	38	2.68	21.41	3.42	3.33	14.77	3.17	0.907482	0.565317	0.604323	80207.1	36336.2	61363.6	14065.3	62284.4	52652.9	5.7025	0.583393	1.16544
7	0	19	1	3080	542.6	5.67637	37	60	37733.7	.	.	1.54	3.08	19.4805	0	19	2	8.54701	5.7	23	15	2.38166	11.6971	3.27979	3.28627	18.5263	3.58239	0.780754	0.58121	0.743236	72010.8	30513.1	81947.8	15607	65760.6	56614.1	4.61402	0.464003	1.44748
46	0	28	7	3170	557.07	5.69049	40	64	19.5	6.7	1.9	1.45	2.9	22.069	0	9	2.83333	16.41	4.3	19	27	3.55046	22.626	3.80926	4.69466	40.2851	3.63009	1.10301	0.905716	1.23833	63925.5	14433.6	67434	19337.1	67396.1	54123.4	3.30584	0.214161	1.24593
58	0	27	2	2935	569.3	5.15545	40	74	1.9	.	.	1.58	3.16	23.4177	0	16	2.08333	5.86	3.3	12	7	2.64218	12.8125	4.57892	2.69914	27.3927	3.67828	2.45707	1.38812	1.71581	.	.	.	.	.	.	.	.	.
77	0	16	1	3540	680.7	5.20053	40	68	651.6	.	.	1.51	3.02	22.5166	0	5	1.91667	0.91	3.4	15	7	3.04954	17.16	3.75854	3.15307	15.4549	3.67828	0.87142	0.673678	0.865372	.	.	.	.	.	.	.	.	.
140	0	22	3	3235	494.33	6.54421	38	68.8	58.5	.	.	1.66	3.32	20.7229	0	12	2.91667	9.96	4.6	10	1	2.52816	23.3839	4.6985	3.28627	76.6012	4.35239	1.5844	1.16969	0.6731	.	.	.	.	.	.	.	.	.
241	0	35	3	2780	488.04	5.69625	38	70	903.6	.	.	1.57	3.14	22.293	0	12	1.91667	8.55	5.4	16	6	4.00605	9.84275	6.0447	4.69466	20.2707	4.13523	1.45744	1.01757	1.04022	.	.	.	.	.	.	.	.	.
287	0	23	5	3350	527.65	6.34891	40	58	0.5	.	.	1.49	2.98	19.4631	0	34	1.83333	5.35	.	31	5	4.99475	14.5079	4.75924	4.01913	8.23519	3.67828	1.60096	1.34549	1.28868	.	.	.	.	.	.	.	.	.
338	0	17	1	3300	587.05	5.62133	39	76	681.2	.	.	1.76	3.52	21.5909	0	14	1.16667	8.73	4.4	29	12	4.54755	30.1137	7.27788	5.15259	59.2708	6.00734	1.09122	0.889848	1.36121	11041.9	14242.7	43683.7	12748.5	57063.5	36785.7	0.866133	0.249594	1.18752
344	0	22	2	3125	489.25	6.38733	39	57	11990	.	.	1.58	3.16	18.038	0	14	1.91667	3.38	4.5	15	7	4.71722	56.0446	12.2176	8.17666	207.2	7.038	1.15144	1.05895	1.06577	.	.	.	.	.	.	.	.	.
350	0	34	8	2950	488.23	6.04223	41	57	385.4	.	.	1.59	3.18	17.9245	0	15	1.92	0.9	.	35	16	3.58	51.09	5.65	4.75	126.06	5.23	0.526476	1.07039	0.313469	.	.	.	.	.	.	.	.	.
417	0	22	1	2790	463.66	6.01734	39	53	1499	.	.	1.59	3.18	16.6667	0	12	2.75	16.1702	3.8	52	2	3.81995	110.123	5.14039	4.42008	384.017	6.72896	0.904029	0.99525	0.822389	.	.	.	.	.	.	.	.	.
451	0	24	2	3090	505.12	6.11736	40	72	1408	.	.	1.65	3.3	21.8182	0	8	2.91667	8.66	3.5	54	5	4.0175	63.3972	5.85111	8.26658	326.678	4.99025	0.291373	0.435919	0.460538	.	.	.	.	.	.	.	.	.
504	0	37	11	3680	648.1	5.67814	39	90	4161	.	0.5	1.58	3.16	28.481	0	8	2	7.88	3.4	10	16	3.7241	22.6855	5.45382	5.45999	55.7342	3.68841	0.947988	0.921867	1.12615	91527.5	114942	72573.3	21316.3	82060.8	57160.9	4.29379	1.4007	1.26963
528	0	23	2	3320	545.18	6.08973	39	64	8754	.	.	1.55	3.1	20.6452	0	6	1.91667	10.48	.	12	10	3.7241	24.9401	6.72059	5.84922	146.796	7.3594	0.702193	0.883089	1.22764	.	.	.	.	.	.	.	.	.
4	1	15	1	3260	614.5	5.30513	40	64	672.7	696.7	63.8	1.54	3.08	20.7792	1	22	1.75	7.1	6.1	24	6	.	.	.	.	.	.	1.22896	0.782483	0.793275	.	.	.	.	.	.	.	.	.
70	1	17	1	2415	.	.	40	67	1372	1372	1818.7	.	.	.	0	20	1.92	9.78	2.2	36	9	.	.	.	.	.	.	1.2209	0.825953	1.18583	.	.	.	.	.	.	.	.	.
248	1	19	2	3125	615.3	5.07882	37	60.3	561.4	561.4	417.5	1.53	3.06	19.7059	0	12	2	1.08	4.4	13	8	2.96458	9.50574	4.17982	3.96659	27.698	3.30635	1.32083	0.755567	0.715683	.	.	.	.	.	.	.	.	.
416	1	36	2	3310	642.7	5.15015	39	75	4758	4758	22580	1.63	3.26	23.0061	1	14	2.75	5.26	3.9	11	3	4.71722	90.7144	11.957	20.2264	298.264	12.7807	0.242817	0.483514	0.230189	.	.	.	.	.	.	.	.	.
461	1	17	1	2500	455.54	5.48799	38	60	9046	.	62.1	1.64	3.28	18.2927	2	15	1.91667	2.86885	4.9	10	14	3.91773	33.7709	6.27287	3.91652	132.626	5.60712	0.374215	0.536865	0.696595	.	8594.3	14775.3	17338.8	66137.2	63155.1	.	0.129947	0.233952
582	1	16	1	3320	411.75	8.06315	40	66	61120	61120	63440	1.49	2.98	22.1477	1	18	2	2.39	4.5	34	7	3.5839	89.7924	16.6421	94.287	138.123	8.87507	0.454843	1.01969	1.22043	.	.	.	.	.	.	.	.	.
130	2	14	1	3440	654.86	5.25303	38	71	5195	5195	21460	.	.	.	1	8	3.67	2.76	3.5	50	50	3.41	101.04	5.27	35.29	181.6	8.17	0.994085	0.687119	0.700226	52651.7	47587.8	33296.4	20558	65491.8	36815	2.56113	0.726622	0.904425
394	2	15	1	2365	.	.	35	52	1.5	.	900	1.55	3.1	16.7742	2	13	3	7.17	.	21	16	.	.	.	.	.	.	0.464078	0.343797	0.342789	.	.	.	.	.	.	.	.	.
20	3	19	4	3680	947.34	3.88456	39	72	2989.2	.	.	1.6	3.2	22.5	1	20	3	8.33	5.8	15	9	3.50247	25.5259	3.80926	3.66272	33.7911	3.77618	0.62761	0.569446	0.900559	.	.	.	.	.	.	.	.	.
21	3	17	1	3545	583.07	6.07989	41	64	1957.8	.	.	1.56	3.12	20.5128	2	21	2.25	8.25	5.8	25	5	.	.	.	.	.	.	0.221894	0.23711	0.145379	.	.	.	.	.	.	.	.	.
90	3	23	4	3190	725.47	4.39715	39	72.4	1362	.	.	1.55	3.1	23.3548	1	11	2.91667	13.39	4.8	19	23	3.59896	45.8276	4.34724	3.2414	261.686	4.69548	1.14032	1.06742	1.4762	75018.4	22439.7	75747.9	19491	63960.8	58804.1	3.84888	0.350834	1.28814
94	3	33	7	3510	583.3	6.01749	39	60	3237	.	.	1.56	3.12	19.2308	1	12	1.91667	3.38	4.1	26	22	2.75989	11.4326	4.63839	3.37743	9.95901	3.82589	1.47268	1.04437	0.956537	75153.4	40261.3	49400.3	25064	98062.8	80088.6	2.99847	0.410566	0.61682
105	3	28	1	2960	995.1	2.97458	38	69	15840	.	.	1.6	3.2	21.5625	2	10	2.08333	8.5	3.4	31	8	2.96458	504.285	5.20299	7.49425	4766.86	8.07606	0.808568	0.743101	0.998541	.	.	.	.	.	.	.	.	.
124	3	30	1	2905	582.1	4.99055	38	63	1754	.	.	1.55	3.1	20.3226	1	33	2.91667	6.76329	5.7	11	3	3.79819	22.1339	4.57892	3.42374	55.3	4.24268	0.586393	0.315373	0.348177	.	.	.	.	.	.	.	.	.
262	3	26	4	3055	494.25	6.18108	38	92	242.1	.	.	1.63	3.26	28.2209	1	12	1.91667	6.76	4.4	8	7	2.84047	52.6938	4.88269	2.09323	187.552	3.97816	3.99845	2.34832	1.62438	.	.	.	.	.	.	.	.	.
278	3	20	1	3100	451.81	6.86129	39	63.7	414.7	.	.	1.5	3	21.2333	2	30	2.08333	5.34759	3.7	59	15	4.33485	19.389	5.40349	4.07222	27.3927	5.44903	0.537539	0.340359	0.357966	28480	37087.3	46542.2	16623.5	51949.6	34675.8	1.71323	0.713909	1.34221
289	3	18	1	2700	499.8	5.40216	39	59	4503	.	.	1.55	3.1	19.0323	1	18	2.75	12.1212	3.6	15	11	3.45498	15.0053	5.07283	3.66272	40.7291	3.87612	1.53788	0.977474	1.1546	88139.7	47115.3	70331.2	29346.4	66728.6	81912.6	3.00343	0.706074	0.858613
326	3	24	1	3200	549.49	5.82358	41	62.5	15970	.	.	1.55	3.1	20.1613	2	23	2.75	12.12	4.5	36	14	3.35942	14.6526	4.78431	6.33305	63.6764	5.41567	0.261329	0.445233	0.29096	25594.2	29992.2	78738.8	9676.6	51134.5	30674.3	2.64496	0.586536	2.56693
335	3	19	2	3585	564.8	6.34738	42	65	86.5	.	.	1.6	3.2	20.3125	1	27	2.75	16.17	4.5	21	6	3.7241	29.1848	5.45382	5.33523	102.864	5.80429	0.749469	0.78167	0.77695	.	.	.	.	.	.	.	.	.
339	3	26	5	3400	668.85	5.08335	41	65	3031	1.9	0.9	1.61	3.22	20.1863	2	30	2	2.87	4.7	75	13	5.32119	76.2407	6.79784	5.58721	63.0279	4.75994	0.50433	0.486878	0.578101	72579.8	13999.4	63146	20236.3	66348.2	52021	3.58662	0.210998	1.21386
358	3	27	2	3565	587.15	6.0717	38	83	2682	.	.	1.68	3.36	24.7024	2	7	2.91667	12.36	6	10	5	4.49212	10.9156	5.98891	4.52682	19.7082	3.55255	0.855263	0.873652	0.816991	.	.	.	.	.	.	.	.	.
402	3	17	1	3390	441.7	7.67489	39	75	2971	.	.	1.65	3.3	22.7273	2	16	1.08333	5.81	4.2	11	6	4.83321	144.973	14.6553	7.08411	157.599	15.2793	0.773214	1.04945	0.812474	.	.	.	.	.	.	.	.	.
422	3	26	3	3320	563.14	5.89551	39	63	3051	.	.	1.55	3.1	20.3226	1	11	0.92	6.99	4.3	15	14	3.68	47.04	5.45	5.15	139.53	5.74	0.860914	0.677424	1.03447	89572	15874.7	41541.8	27412.1	80754.6	80880.6	3.26761	0.196579	0.513619
424	3	28	4	2870	411.84	6.96873	38	61	277.7	.	.	1.56	3.12	19.5513	2	17	2.66667	8.73362	3.6	17	7	3.5839	2444.95	5.98891	7.48802	157.599	4.70375	0.450919	1.45612	0.751004	.	.	.	.	.	.	.	.	.
433	3	33	5	2745	502.74	5.46008	40	54	4553	.	.	1.5	3	18	1	24	2	10	.	37	2	3.81995	46.0812	8.80458	4.85982	169.193	5.169	0.626741	0.6118	0.74711	.	.	.	.	.	.	.	.	.
488	3	17	1	3075	573.25	5.36415	39	48.5	502	.	.	1.48	2.96	16.3851	2	12	1.75	3.97	5.1	22	4	4.95156	17.5856	6.34564	6.47746	64.3316	4.99025	0.656761	0.607784	0.627807	.	.	.	.	.	.	.	.	.
507	3	34	6	2955	460.36	6.41889	38	62.9	15430	.	.	1.55	3.1	20.2903	1	5	2.83333	10.83	2.8	7	1	3.5839	112.391	7.11467	7.9121	231.61	5.73792	1.00065	1.11894	1.11218	.	.	.	.	.	.	.	.	.
512	3	25	1	3110	521.15	5.96757	40	59	5111	.	.	.	.	.	2	19	2.91667	8.47	3.8	24	6	3.40342	24.4212	6.05884	3.91652	72.7305	4.75994	0.199428	0.335092	0.252682	.	.	.	.	.	.	.	.	.
42	.	28	2	3220	673.4	4.7817	39	69	.	.	.	1.58	3.16	21.8354	.	7	2	5.83333	2.7	18	4	2.24125	65.274	5.33594	3.2414	135.795	7.61811	0.915061	0.959351	0.57232	.	.	.	.	.	.	.	.	.
45	.	24	1	3325	556.4	5.97592	37	95	.	.	.	1.58	3.16	30.0633	.	15	1.83333	4.84848	4.8	13	5	3.00684	18.1413	3.86053	3.15307	17.9097	3.48847	0.966231	0.703017	0.808541	.	.	.	.	.	.	.	.	.
84	.	17	1	3065	529.74	5.78586	40	68	.	.	.	1.54	3.08	22.0779	.	18	3.08333	12.1528	3.7	9	1	3.04954	9.07263	5.13756	2.29482	7.29837	2.76399	.	.	.	38467.4	13428.2	26126.7	21132.6	46019.1	32179.2	1.82028	0.291796	0.811912
138	.	18	1	3400	678.48	5.0112	38	64	.	.	.	1.55	3.1	20.6452	.	13	1.91667	3.57143	.	11	7	2.96458	22.876	3.80926	2.58419	28.6338	4.02997	0.743776	0.703992	0.848445	.	.	.	.	.	.	.	.	.
149	.	21	1	2980	423	7.04492	39	68	.	.	.	1.62	3.24	20.9877	.	11	2.75	11.0619	4.1	13	5	3.90102	11.4326	4.01763	3.28627	14.7657	4.81466	0.824985	0.896659	0.960191	.	.	.	.	.	.	.	.	.
151	.	29	1	3560	619.87	5.74314	38	92	.	.	.	1.61	3.22	28.5714	.	26	1.91667	2.7027	4	4	5	2.52816	15.6935	3.46522	3.61391	14.2678	3.04695	2.60167	1.50695	1.73736	.	.	.	.	.	.	.	.	.
155	.	22	3	4090	761.75	5.36922	40	83	.	.	.	1.6	3.2	25.9375	.	13	2.08333	8.98876	3.8	28	5	2.31071	29.7372	4.29084	2.47281	60.3297	3.30635	1.02416	.	1.22382	.	.	.	.	.	.	.	.	.
164	.	24	4	2890	482.75	5.98654	38	80	.	.	.	1.59	3.18	25.1572	.	11	1.83333	14.8325	4.2	21	3	2.84047	16.5956	4.23503	3.06658	62.3296	4.81466	1.18751	0.973418	1.33968	.	.	.	.	.	.	.	.	.
179	.	19	2	3700	513.05	7.21177	40	68.3	.	.	.	1.6	3.2	21.3437	.	8	3	17.7215	3.2	47	12	2.79996	80.8016	5.20299	3.02402	111.838	5.65252	1.17197	1.15679	1.45841	.	.	.	.	.	.	.	.	.
180	.	20	1	3022	621.8	4.86008	39	71	.	.	.	1.61	3.22	22.0497	.	32	1.83333	5.64103	4	24	7	2.60377	10.6718	4.23503	3.15307	12.5731	3.21809	1.05295	0.815429	0.808541	.	.	.	.	.	.	.	.	.
190	.	23	2	3050	478.95	6.3681	40	116	.	.	.	1.6	3.2	36.25	.	18	1.91667	4.01786	4.4	16	4	3.408	34.617	5.97039	3.56561	38.556	6.15262	0.949632	0.847997	0.733512	.	.	.	.	.	.	.	.	.
206	.	29	2	3125	623.93	5.00857	40	88	.	.	.	1.61	3.22	27.3292	.	16	3.16667	15.9292	4.9	10	7	2.84047	26.0902	5.54074	2.66042	91.086	4.57874	0.962555	0.735925	0.887853	.	.	.	.	.	.	.	.	.
226	.	33	3	2900	592.6	4.89369	39	85	.	.	.	1.58	3.16	26.8987	.	15	1.91667	9.26641	5.4	8	14	3.84933	42.0461	8.68313	3.71204	80.8644	6.4551	.	2.24643	.	.	.	.	.	.	.	.	.	.
235	.	21	1	3840	672.1	5.71344	39	61.5	.	.	.	1.54	3.08	19.9675	.	18	2.91667	4.54545	5.5	15	1	4.33485	9.84275	5.40349	3.47053	15.1066	4.4081	0.944708	0.882477	0.962857	.	.	.	.	.	.	.	.	.
237	.	17	1	3140	572.11	5.48846	40	67	.	.	.	1.57	3.14	21.3376	.	14	2.75	12.8	5.8	23	5	4.05941	25.8066	4.57892	2.81777	29.2746	5.58399	1.10186	1.55577	1.28333	.	.	.	.	.	.	.	.	.
240	.	36	6	2900	407.25	7.12093	41	59	.	.	.	1.42	2.84	20.7746	.	20	1	4.74138	6	11	3	3.90102	69.5942	4.63839	2.15901	498.065	7.01554	1.20451	1.79767	1.29899	.	.	.	.	.	.	.	.	.
252	.	24	3	3530	495.6	7.12268	39	62.5	.	.	.	1.52	3.04	20.5592	.	6	1.83333	9.96169	5.4	10	.	2.84047	46.8237	4.01763	2.47281	58.3929	4.52127	1.23494	1.18069	1.3153	.	.	.	.	.	.	.	.	.
259	.	18	1	3150	549.3	5.73457	41	66	.	.	.	1.58	3.16	20.8861	.	9	2.83333	9.17031	4.3	9	6	3.13633	21.4148	3.91234	2.77781	47.47	3.87612	2.61886	1.69717	1.36973	.	.	.	.	.	.	.	.	.
269	.	24	1	2590	435.62	5.94555	40	65	.	.	.	1.5	3	21.6667	.	11	2	15.625	.	16	2	4.11333	16.0487	5.82413	3.28627	55.3	3.82589	0.844073	1.1089	0.660849	.	.	.	.	.	.	.	.	.
272	.	29	5	3040	532.93	5.70431	41	68	.	.	.	1.48	2.96	22.973	.	9	1.91667	8	5.6	26	5	4.99475	87.9876	6.83274	3.61391	672.328	5.18738	0.677569	0.531496	0.650623	.	.	.	.	.	.	.	.	.
297	.	26	3	2980	494.81	6.02251	38	64	.	.	.	1.59	3.18	20.1258	.	13	1	5.08475	4.8	17	5	3.31552	11.8314	6.58749	2.15901	13.4727	3.77618	1.28382	1.14761	1.18665	.	.	.	.	.	.	.	.	.
353	.	30	1	3750	644.3	5.82027	38	72	.	.	.	1.55	3.1	23.2258	.	10	1.83333	4.54545	5.4	20	2	3.31586	40.2864	4.61409	10.7099	100.792	4.81667	.	.	.	.	.	.	.	.	.	.	.	.
359	.	34	5	4165	822.75	5.06229	39	73.5	.	.	.	1.64	3.28	22.4085	.	12	2.75	3.83142	4.7	5	4	4.6601	12.0499	5.58362	5.58721	19.7082	4.32554	0.960222	1.14324	1.08477	.	.	.	.	.	.	.	.	.
363	.	36	3	3675	786.8	4.67082	37	101	.	.	.	1.68	3.36	30.0595	.	7	2	4.54545	3.6	9	2	5.01163	125.72	6.41915	5.09289	217.961	5.54268	0.996154	1.72564	1.11643	62258.8	27897.4	42619.9	25045	56166.4	38145.1	2.48587	0.496691	1.11731
365	.	26	4	3540	651.8	5.43111	40	66	.	.	.	1.56	3.12	21.1538	.	10	1.91667	13.2	2.9	6	1	4.6601	7.88942	5.51839	4.16217	12.8376	4.22216	0.893439	0.793406	1.0395	49262.1	16700.8	47173.6	21920.8	68873.8	45808.4	2.24728	0.242484	1.0298
377	.	19	2	3630	633.7	5.72826	39	90	.	.	.	1.66	3.32	27.1084	.	15	2	2.92887	3.7	2	1	5.01163	72.4357	7.19587	5.58721	209.309	5.87131	0.818719	0.959351	0.821534	71903.9	15308.2	38834.5	23909.8	66292.5	61687.7	3.0073	0.23092	0.629533
397	.	33	5	3890	775.85	5.01386	42	82	.	.	.	1.6	3.2	25.625	.	9	2.91667	5.94406	3.6	39	7	3.91773	272.093	4.727	4.11208	494.342	14.6534	0.996154	0.953385	0.956206	.	.	.	.	.	.	.	.	.
434	.	19	1	3700	534.2	6.92624	41	60	.	.	.	1.47	2.94	20.4082	.	28	2.83333	10	3.8	19	2	3.96737	21.2924	5.91967	5.52329	76.5412	4.27359	0.974302	0.944833	1.16183	80849.4	25472.8	50408.8	18940.3	62262.1	55689.4	4.26866	0.409122	0.905179
438	.	24	1	3400	657.58	5.17047	40	79	.	.	.	1.52	3.04	25.9868	.	17	1.83333	4.58333	3	53	16	4.43724	24.4212	5.07956	8.54165	86.5098	5.54268	1.2192	1.12282	1.20614	.	.	.	.	.	.	.	.	.
439	.	37	7	3960	682.62	5.80118	41	79	.	.	.	1.65	3.3	23.9394	.	8	2	3.94737	2.7	8	7	3.40342	68.8182	6.41915	3.59213	146.796	5.35309	0.966566	1.76251	1.19573	.	.	.	.	.	.	.	.	.
459	.	25	6	3870	680.25	5.68908	39	65	.	.	.	1.57	3.14	20.7006	.	14	1.91667	9.65251	3.3	17	1	4.27587	24.4212	5.38988	5.09289	93.8578	4.22216	1.14547	0.873652	0.983088	.	.	.	.	.	.	.	.	.
470	.	18	1	3345	663.3	5.04297	39	70	.	.	.	1.58	3.16	22.1519	.	12	1.83333	6.76692	3.6	16	10	3.91773	181.307	9.83103	4.52682	437.915	9.16975	1.57892	1.4627	1.78682	.	.	.	.	.	.	.	.	.
471	.	15	1	3390	559.15	6.06277	39	60	.	.	.	1.51	3.02	19.8675	.	9	1.91667	6.83453	3.4	17	1	6.13074	44.2165	7.27788	8.72956	289.351	6.28753	0.623491	0.582622	0.63635	72286.7	41618.7	61580.2	15771.3	64053	47881.4	4.58344	0.649755	1.2861
475	.	21	1	3695	655.22	5.63933	39	62.5	.	.	.	1.5	3	20.8333	.	23	1.08333	12.8205	2.8	12	3	5.0723	11.0366	6.41915	4.74665	35.7818	5.47886	0.621334	0.663023	0.757015	73557.8	33667.9	82957.9	15487.5	64994.2	55461.5	4.74948	0.518014	1.49577
476	.	18	1	2745	588.18	4.66694	39	55	.	.	.	1.6	3.2	17.1875	.	5	2.75	11.3821	3.1	44	8	5.44943	14.3395	5.01933	5.27376	76.5412	5.35309	1.12384	1.10048	1.3332	.	.	.	.	.	.	.	.	.
478	.	32	2	3035	696.78	4.35575	39	61	.	.	.	1.55	3.1	19.6774	.	8	1.91667	9.66387	3.2	19	8	4.17097	18.7471	5.58362	4.06247	102.864	5.41567	0.72419	0.794782	0.910918	.	.	.	.	.	.	.	.	.
496	.	17	1	2940	518.95	5.66529	40	59	.	.	.	1.59	3.18	18.5535	.	9	1.91667	7.52688	3.7	9	1	4.17097	34.4806	6.12948	4.06247	96.7697	5.54268	1.28738	1.24154	1.07058	51224	44908.9	41244.7	29033.4	67971.1	52349.4	1.76431	0.660706	0.787873
499	.	28	3	2860	660.35	4.33104	37	69	.	.	.	1.66	3.32	20.7831	.	11	2	8.53659	4.3	12	6	4.27587	30.1137	6.72059	3.91652	126.059	4.93182	0.664085	0.753736	0.818976	.	.	.	.	.	.	.	.	.
500	.	23	1	3080	548.4	5.61634	39	95	.	.	.	1.65	3.3	28.7879	.	12	1.83333	5.67376	3.8	7	1	4.6601	266.631	6.72059	4.58098	340.158	6.57892	1.1659	1.1951	1.23276	66158.6	49863.2	75344.4	17249.4	64079.8	34831.3	3.83541	0.778143	2.16312
502	.	27	1	3210	545.61	5.88332	40	62.7	.	.	.	1.57	3.14	19.9682	.	16	1.91667	3.48837	4	24	1	3.49275	14.4952	4.727	3.86882	43.098	3.68841	0.656533	0.629218	0.842	74289.7	72176.6	88295.4	16971.8	53906	24224.4	4.37723	1.33893	3.6449
510	.	16	1	3720	609.2	6.10637	39	78	.	.	.	1.62	3.24	24.0741	.	10	1.91667	3.4188	2.9	8	1	3.35942	1056.46	9.40815	8.92117	7758.49	15.9302	0.561921	0.56219	0.438878	69648.8	44523.3	64363.1	13553.7	67194.1	21087.6	5.13874	0.662607	3.05218
517	.	17	1	3330	519.38	6.41149	40	61	.	.	.	1.54	3.08	19.8052	.	9	1.91667	8.20896	4.7	17	4	4.1193	60.225	5.98891	5.09289	264.173	5.29113	1.18504	0.994905	1.39512	.	.	.	.	.	.	.	.	.
521	.	27	4	3225	621.27	5.19098	38	100	.	.	.	1.55	3.1	32.2581	.	12	1.08333	1.21951	3.6	20	1	4.32912	21.0683	4.95969	4.11208	399.855	4.27359	1.77761	1.41778	1.69513	33007.6	58984	48825.4	9351.18	57525.4	14932.2	3.52978	1.02536	3.2698
523	.	14	1	3250	507	6.41026	39	57.7	.	.	.	1.58	3.16	18.2595	.	5	1.08333	1.16279	4.3	4	2	4.17097	113.543	22.5478	6.69943	412.16	13.4729	0.53605	0.663713	0.4481	59881.3	73501.9	56407	10267.7	61366.1	19594.4	5.832	1.19776	2.87873
525	.	14	1	2975	327.15	9.09369	40	64	.	.	.	1.6	3.2	20	.	13	1.08333	0.60241	4	12	1	3.96737	88.8798	9.00178	5.52329	437.915	8.58892	0.915379	0.845649	1.14028	59154.2	96143.5	76681.1	15910	67732.3	22369.8	3.71806	1.41946	3.42789
				PLACENTAL MALARIA (PM)
				0 = NO PM
				1 = ACTIVE/ACCUTE PM
				2 = ACTIVE/CHRONIC PM
				3 = PAST PM
				HEMOZOIN
				0 = ABSENT
				1 = LEVE
				2 = MODERATE
				3 = SEVERE

## Sheet: MATERNAL AGE
	NI	Pf-INF		NI	Pf-INF PM-	Pf-INF PM+				OUTLIERS	NI	Pf-INF		NI	Pf-INF PM-	Pf-INF PM+
Number of values	45	43		45	15	28
25% Percentile	18	17		18	20	17
Median	24	23		24	23	21.5
75% Percentile	28.5	28		28.5	28	27.75
Mean	23.82	23.44		23.82	24.6	22.82
Std. Deviation	6.326	6.482		6.326	6.423	6.544
Std. Error of Mean	0.943	0.9885		0.943	1.658	1.237
D'Agostino & Pearson omnibus normality test
K2	3.27	3.995
P value	0.1949	0.1357
Passed normality test (alpha=0.05)?	Yes	Yes
P value summary	ns	ns
Unpaired t test				Dunn's multiple comparisons test	Mean rank diff,	Significant?	Summary	Adjusted P Value
P value	0.7812
P value summary	ns			NI vs. PM-	-2.511	No	ns	> 0,9999
Significantly different? (P < 0.05)	No			NI vs. PM+	4.663	No	ns	> 0,9999
One- or two-tailed P value?	Two-tailed			PM- vs. PM+	7.174	No	ns	> 0,9999
t, df	t=0,2786 df=86
				Test details	Mean rank 1	Mean rank 2	Mean rank diff,	n1	n2
				NI vs. PM-	45.56	48.07	-2.511	45	15
				NI vs. PM+	45.56	40.89	4.663	45	28
				PM- vs. PM+	48.07	40.89	7.174	15	28

## Sheet: GRAVIDITY
	NI	Pf-INF		NI	Pf-INF PM-	Pf-INF PM+				OUTLIERS	NI	Pf-INF		NI	Pf-INF PM-	Pf-INF PM+
												11			7	7
Number of values	45	39		45	12	26						7			8	6
												8			11
25% Percentile	1	1		1	1	1						7
Median	1	2		1	2	1
75% Percentile	3	3		3	2.75	3.25
Mean	2.222	2.128		2.222	2.083	2
Std. Deviation	1.677	1.454		1.677	1.165	1.414
Std. Error of Mean	0.25	0.2329		0.25	0.3362	0.2774
D'Agostino & Pearson omnibus normality test
K2	11.78	8.427
P value	0.0028	0.0148
Passed normality test (alpha=0.05)?	No	No
P value summary	**	*
Mann Whitney test				Dunn's multiple comparisons test	Mean rank diff,	Significant?	Summary	Adjusted P Value
P value	0.9484
Exact or approximate P value?	Exact			NI vs. PM-	-3.242	No	ns	> 0,9999
P value summary	ns			NI vs. PM+	2.454	No	ns	> 0,9999
Significantly different? (P < 0.05)	No			PM- vs. PM+	5.696	No	ns	> 0,9999
One- or two-tailed P value?	Two-tailed
Sum of ranks in column A,B	1906 , 1665
Mann-Whitney U	870.5			Test details	Mean rank 1	Mean rank 2	Mean rank diff,	n1	n2
				NI vs. PM-	42.3	45.54	-3.242	45	12
				NI vs. PM+	42.3	39.85	2.454	45	26
				PM- vs. PM+	45.54	39.85	5.696	12	26

## Sheet: GESTATIONAL AGE
	NI	Pf-INF		NI	Pf-INF PM-	Pf-INF PM+				OUTLIERS	NI	Pf-INF		NI	Pf-INF PM-	Pf-INF PM+
Number of values	45	43		45	15	28
25% Percentile	39	38		39	38	38
Median	39	39		39	39	39
75% Percentile	40	40		40	40	40
Mean	39.31	39.02		39.31	39.07	39
Std. Deviation	1.125	1.318		1.125	1.163	1.414
Std. Error of Mean	0.1676	0.201		0.1676	0.3003	0.2673
D'Agostino & Pearson omnibus normality test
K2	0.09989	3.195
P value	0.9513	0.2024
Passed normality test (alpha=0.05)?	Yes	Yes
P value summary	ns	ns
Unpaired t test				Dunn's multiple comparisons test	Mean rank diff,	Significant?	Summary	Adjusted P Value
P value	0.2728
P value summary	ns			NI vs. PM-	4.089	No	ns	> 0,9999
Significantly different? (P < 0.05)	No			NI vs. PM+	6.365	No	ns	0.8504
One- or two-tailed P value?	Two-tailed			PM- vs. PM+	2.276	No	ns	> 0,9999
t, df	t=1,104 df=86
				Test details	Mean rank 1	Mean rank 2	Mean rank diff,	n1	n2
				NI vs. PM-	47.22	43.13	4.089	45	15
				NI vs. PM+	47.22	40.86	6.365	45	28
				PM- vs. PM+	43.13	40.86	2.276	15	28

## Sheet: BODY MASS INDEX
	NI	Pf-INF		NI	Pf-INF PM-	Pf-INF PM+				OUTLIERS	NI	Pf-INF		NI	Pf-INF PM-	Pf-INF PM+
											36.25			36.25
Number of values	44	40		44	15	25
25% Percentile	20.45	19.47		20.45	19.46	19.39
Median	21.51	20.58		21.51	20.97	20.32
75% Percentile	25.51	22.26		25.51	22.29	22.33
Mean	22.82	20.89		22.82	21.07	20.77
Std. Deviation	3.526	2.589		3.526	2.8	2.507
Std. Error of Mean	0.5316	0.4094		0.5316	0.7229	0.5014
D'Agostino & Pearson omnibus normality test
K2	6.63	10
P value	0.0363	0.0067
Passed normality test (alpha=0.05)?	No	No
P value summary	*	**
Mann Whitney test				Dunn's multiple comparisons test	Mean rank diff,	Significant?	Summary	Adjusted P Value
P value	0.0128
Exact or approximate P value?	Exact			NI vs. PM-	10.68	No	ns	0.4289
P value summary	*			NI vs. PM+	14.7	Yes	*	0.0484
Significantly different? (P < 0.05)	Yes			PM- vs. PM+	4.02	No	ns	> 0,9999
One- or two-tailed P value?	Two-tailed
Sum of ranks in column A,B	2147 , 1424
Mann-Whitney U	603.5			Test details	Mean rank 1	Mean rank 2	Mean rank diff,	n1	n2
				NI vs. PM-	48.78	38.1	10.68	44	15
				NI vs. PM+	48.78	34.08	14.7	44	25
				PM- vs. PM+	38.1	34.08	4.02	15	25

## Sheet: PLACENTAL WEIGHT
	NI	Pf-INF		NI	Pf-INF PM-	Pf-INF PM+				OUTLIERS	NI	Pf-INF		NI	Pf-INF PM-	Pf-INF PM+
				45	15	25						947.34				995.1
Number of values	45	39										995.1
25% Percentile	519.2	488.2		519.2	488.2	477.3
Median	592.6	545.2		592.6	527.7	564.8
75% Percentile	661.8	587.1		661.8	569.3	614.9
Mean	591.2	543.8		591.2	536.5	564.3
Std. Deviation	103.9	76.61		103.9	64.44	114.8
Std. Error of Mean	15.49	12.27		15.49	16.64	22.97
D'Agostino & Pearson omnibus normality test
K2	0.1899	1.094
P value	0.9094	0.5788
Passed normality test (alpha=0.05)?	Yes	Yes
P value summary	ns	ns
Unpaired t test				Dunn's multiple comparisons test	Mean rank diff,	Significant?	Summary	Adjusted P Value
P value	0.0211
P value summary	*			NI vs. PM-	15.6	No	ns	0.1022
Significantly different? (P < 0.05)	Yes			NI vs. PM+	9	No	ns	0.4315
One- or two-tailed P value?	Two-tailed			PM- vs. PM+	-6.6	No	ns	> 0,9999
t, df	t=2,351 df=82
				Test details	Mean rank 1	Mean rank 2	Mean rank diff,	n1	n2
				NI vs. PM-	48.4	32.8	15.6	45	15
				NI vs. PM+	48.4	39.4	9	45	25
				PM- vs. PM+	32.8	39.4	-6.6	15	25

## Sheet: NEWBORN WEIGHT
	NI	Pf-INF		NI	Pf-INF PM-	Pf-INF PM+				OUTLIERS	NI	Pf-INF		NI	Pf-INF PM-	Pf-INF PM+
Number of values	45	43		45	15	28
25% Percentile	3029	2935		3029	2935	2918
Median	3250	3125		3250	3125	3158
75% Percentile	3685	3350		3685	3320	3398
Mean	3331	3129		3331	3129	3128
Std. Deviation	383.2	330.8		383.2	292.9	354.7
Std. Error of Mean	57.12	50.45		57.12	75.62	67.02
D'Agostino & Pearson omnibus normality test
K2	2.798	1.671
P value	0.2468	0.4337
Passed normality test (alpha=0.05)?	Yes	Yes
P value summary	ns	ns
Unpaired t test				Dunn's multiple comparisons test	Mean rank diff,	Significant?	Summary	Adjusted P Value
P value	0.0098
P value summary	**			NI vs. PM-	12.52	No	ns	0.3006
Significantly different? (P < 0.05)	Yes			NI vs. PM+	10.75	No	ns	0.2412
One- or two-tailed P value?	Two-tailed			PM- vs. PM+	-1.77	No	ns	> 0,9999
t, df	t=2,642 df=86
				Test details	Mean rank 1	Mean rank 2	Mean rank diff,	n1	n2
				NI vs. PM-	50.06	37.53	12.52	45	15
				NI vs. PM+	50.06	39.3	10.75	45	28
				PM- vs. PM+	37.53	39.3	-1.77	15	28

## Sheet: NEWB TO PLAC WEIGHT RATIO
	NI	Pf-INF		NI	Pf-INF PM-	Pf-INF PM+				OUTLIERS	NI	Pf-INF		NI	Pf-INF PM-	Pf-INF PM+
											9.09	2.97		9.09
Number of values	44	40		44	15	26
25% Percentile	5.045	5.323		5.045	5.62	5.133
Median	5.705	5.76		5.705	5.7	5.655
75% Percentile	6.013	6.165		6.013	6.12	6.223
Mean	5.672	5.828		5.672	5.86	5.7
Std. Deviation	0.728	0.7743		0.728	0.4073	1.073
Std. Error of Mean	0.1098	0.1224		0.1098	0.1052	0.2104
D'Agostino & Pearson omnibus normality test
K2	1.06	5.318
P value	0.5886	0.07
Passed normality test (alpha=0.05)?	Yes	Yes
P value summary	ns	ns
Unpaired t test				Dunn's multiple comparisons test	Mean rank diff,	Significant?	Summary	Adjusted P Value
P value	0.3449
P value summary	ns			NI vs. PM-	-8.571	No	ns	0.7363
Significantly different? (P < 0.05)	No			NI vs. PM+	-2.262	No	ns	> 0,9999
One- or two-tailed P value?	Two-tailed			PM- vs. PM+	6.309	No	ns	> 0,9999
t, df	t=0,950 df=82
				Test details	Mean rank 1	Mean rank 2	Mean rank diff,	n1	n2
				NI vs. PM-	40.8	49.37	-8.571	44	15
				NI vs. PM+	40.8	43.06	-2.262	44	26
				PM- vs. PM+	49.37	43.06	6.309	15	26

## Sheet: SYNCYTIAL NUCLEAR AGGREG
	NI	Pf-INF		NI	Pf-INF PM-	Pf-INF PM+				OUTLIERS	NI	Pf-INF		NI	Pf-INF PM-	Pf-INF PM+
											32			32
Number of values	44	43		44	15	28
25% Percentile	9	11		9	8	12
Median	12	14		12	12	16.5
75% Percentile	15	20		15	16	21.75
Mean	12.61	15.98		12.61	13.8	17.14
Std. Deviation	5.118	7.389		5.118	7.389	7.251
Std. Error of Mean	0.7716	1.127		0.7716	1.908	1.37
D'Agostino & Pearson omnibus normality test
K2	11.07	4.327
P value	0.004	0.1149
Passed normality test (alpha=0.05)?	No	Yes
P value summary	**	ns
Mann Whitney test				Dunn's multiple comparisons test	Mean rank diff,	Significant?	Summary	Adjusted P Value
P value	0.0266
Exact or approximate P value?	Exact			NI vs. PM-	-3.242	No	ns	> 0,9999
P value summary	*			NI vs. PM+	-16.62	Yes	*	0.0192
Significantly different? (P < 0.05)	Yes			PM- vs. PM+	-13.38	No	ns	0.2914
One- or two-tailed P value?	Two-tailed
Sum of ranks in column A,B	1676 , 2152
Mann-Whitney U	686			Test details	Mean rank 1	Mean rank 2	Mean rank diff,	n1	n2
				NI vs. PM-	38.09	41.33	-3.242	44	15
				NI vs. PM+	38.09	54.71	-16.62	44	28
				PM- vs. PM+	41.33	54.71	-13.38	15	28

## Sheet: FIBRIN
	NI	Pf-INF		NI	Pf-INF PM-	Pf-INF PM+				OUTLIERS	NI	Pf-INF		NI	Pf-INF PM-	Pf-INF PM+
Number of values	45	43		45	15	28
25% Percentile	1.83	1.92		1.83	1.92	1.92
Median	1.92	2		1.92	1.92	2.165
75% Percentile	2.415	2.83		2.415	2.75	2.898
Mean	2.039	2.261		2.039	2.118	2.337
Std. Deviation	0.5739	0.5914		0.5739	0.5071	0.6271
Std. Error of Mean	0.08556	0.09018		0.08556	0.1309	0.1185
D'Agostino & Pearson omnibus normality test
K2	0.3034	0.04044
P value	0.8592	0.98
Passed normality test (alpha=0.05)?	Yes	Yes
P value summary	ns	ns
Unpaired t test				Dunn's multiple comparisons test	Mean rank diff,	Significant?	Summary	Adjusted P Value
P value	0.0777
P value summary	ns			NI vs. PM-	-4.144	No	ns	> 0,9999
Significantly different? (P < 0.05)	No			NI vs. PM+	-14.37	No	ns	0.0547
One- or two-tailed P value?	Two-tailed			PM- vs. PM+	-10.22	No	ns	0.6187
t, df	t=1,786 df=86
				Test details	Mean rank 1	Mean rank 2	Mean rank diff,	n1	n2
				NI vs. PM-	39.22	43.37	-4.144	45	15
				NI vs. PM+	39.22	53.59	-14.37	45	28
				PM- vs. PM+	43.37	53.59	-10.22	15	28

[truncated: 16 more sheets: NECROSIS, VASCULARITY, LEUKOCYTES, MONOCYTES, IL-12, IL-8, TNF-a, IL-10, IL-6, IL-1B, ULK1 mRNA, BECN1 mRNA, MAP1LC3B mRNA, ULK1 WB, BECLIN1 WB, LC3II WB]
